# Supplementary material
Source: HighWire-hosted journal article supplement (https://bmjopen.bmj.com/content/11/11/e047365)
Supplement: inline-supplementary-material-1 [file inline-supplementary-material-1.pdf]

**Supplementary Material Appendix 1****Date of Interview:****Asha No.:****Location:****Length:****Interviewee Information****Age:****No. of Patients:****Village(s):****Primary Health Care Center:****Years in the Asha program:****No. of HLG sessions attended:****Education (years of education):****Other projects?****Purpose of the Study**

The purpose of this study is to learn more about Project HOPE and its effects from the perspective of the community health workers (ASHA).

**Introduction**

Good morning/afternoon. My name is Stuti and I am a student who is working with Project HOPE. This my interpreter (insert name) who will be translating for us during our chat. Thank you for taking time out of your busy day to speak with me. I'll try to keep our time to 45-60 minutes once we get into the interview. (Check to see if this is okay) The program is trying to gather information to improve health and quality of life in your villages. Any information you can share with us is very important to us because of how well you know your community. I would like to ask you some questions about your experience with Project HOPE, the health of your patients, and about the health of your community. The themes (big ideas) that emerge from all of the interviews with all the health workers will be summarized and made available to the public; however, your name will never be mentioned and information from individual interviews will be kept strictly confidential.

## **Supplementary Material Appendix 1**

### **Interviewee Questions**

*Interviewer note: Begin with small talk and introductory questions. Ask how they got involved in the ASHA program and the HOPE study.*

#### **Section 1: Community Health Fair screening**

- 1. As part of your participation in the HOPE study, you helped organize community health fairs by raising awareness. Please tell me about your role in community health fairs.**
  - a. What were some difficulties or challenges you faced in this role? How did you approach these challenges?
  - b. What were some rewarding experiences you had in this role?
  - c. Can you tell me about your interactions with HOPE staff for the health fairs?
  - d. How do you think these health fairs influenced people's health management?

#### **Section 2: Healthy Living Groups**

- 2. What was your role in the Healthy Living groups?**
  - a. Tell me about your experience with one of the HLG sessions. How comfortable did you feel with the topic?
  - b. Did you encounter any specific challenges with the HLG sessions?
  - c. Can you tell me about your experience with the mental health HLG session(s) – the one where you discussed depression and anxiety?
    - i. Did you learn anything new about mental health through this session?
    - ii. Did your beliefs change? How so?
  - d. What did you think of the topics and content of the HLG sessions?
  - e. Were you able to lead (or co-lead) any sections of the HLG sessions?
    - i. *If yes:* Tell me about a session you led. How comfortable were you?
    - ii. *If no:* Why not? What were some of the challenges that prevented you from leading?
  - f. How comfortable would you be now with discussing these topics with your patients?
- 3. Tell me a story of one of your patients from the HLG sessions whom you worked with.**

*Interviewer note: if the ASHA is having trouble thinking of someone ask if there were there any patients who found these sessions particularly helpful or challenging? Can you tell me about them?*

- a. When was this patient most talkative? When did they seem more uncomfortable?
- b. How did this patient interact with other patients?
- c. How did the patient interact during the mental health HLG session (the one where you discussed depression and anxiety)?
- d. How do you think the HLG sessions influenced this patient's habits and overall health?

*Interviewer note: If time allows, ask about another patient before moving on. E.g., if they started with patient who found sessions helpful, ask about a patient who found them challenging.*

- e. In what way have your beliefs about depression and anxiety changed since working with this participant and others in the HLG sessions?

#### **Section 3: Tracking and Home visits**

### **Supplementary Material Appendix 1**

*Interviewer note: Some ASHA workers did not do home visits for this project – check before beginning whether they were assigned any home visits specifically for HOPE.*

- 4. As part of your participation in the HOPE study, you helped track patients if they missed appointments through home visits. Please tell me a story of a difficult home visit.**
  - a. What were the patient's challenges with attending assessments and/or HLG sessions?
  - b. What did you talk about during this home visit? Did they attend the next assessment or HLG session? Why or why not?
  - c. What role did the patient's family play during this visit? How did you interact with them?
  - d. How did the HOPE staff and project support you in doing home visits?
- 5. Now, tell me about a home visit when you felt that you were able to help a patient or when you felt that your visit was rewarding.**
  - a. What role did the patient's family play during this visit? How did you interact with them?
  - b. How did your visit influence the patient's health management?

#### **Section 4: Sustainability**

- 6. Now, please think of one of your current patients who participated in the study and who you have seen on a regular basis after the program. How would you describe their current health?**

*Interviewer note: if the ASHA is having trouble thinking of someone, ask if they can think of any patients whose health has improved or declined since the program ended.*

- a. *If story about patient with health declines: Why? What happened?*
  - b. How has this patient managed their goals from the program?
  - c. What kind of challenges is this patient facing? How are they able to use techniques they've learned from HOPE to address these difficulties?
- 7. Please share any thoughts you may have on how the HOPE study program could be improved in the future.**
  - a. Tell me about your overall experience with Project HOPE. What did you like about your experience? Dislike?
    - i. How comfortable were you working with depression and anxiety? How do you feel about these topics now that the program has ended?
  - b. What were specific challenges you faced when working with this program? How could these challenges be addressed?

Thank you for taking the time to speak with me. Before we finish, is there anything else you would like to add about your experience with the community health fairs, Health Living groups, tracking/home visits or anything else related to the HOPE study that you would like that we have not covered?

\*\*\*\*\* If participant wishes to discontinue study, ask if they would be willing to share why:
